# Supplementary material for: Deletion of Smad3 protects against diabetic myocardiopathy in db/db mice
Source: PubMed Central journal article supplement (PMC8107104; doi:10.1111/jcmm.16464), 2021-03-17
Supplement: JCMM-25-4860-s001.pdf [file JCMM-25-4860-s001.pdf]

## A Smad3 genotypes

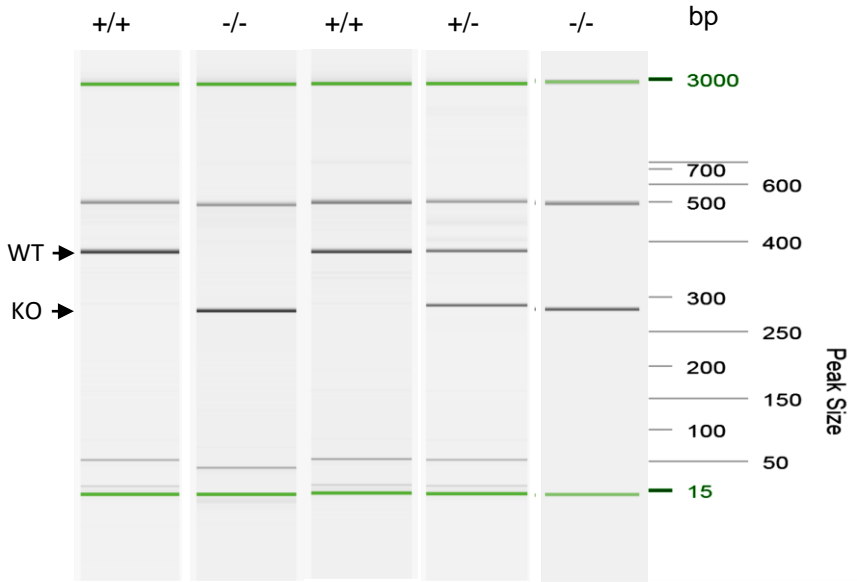

## B db/db genotypes

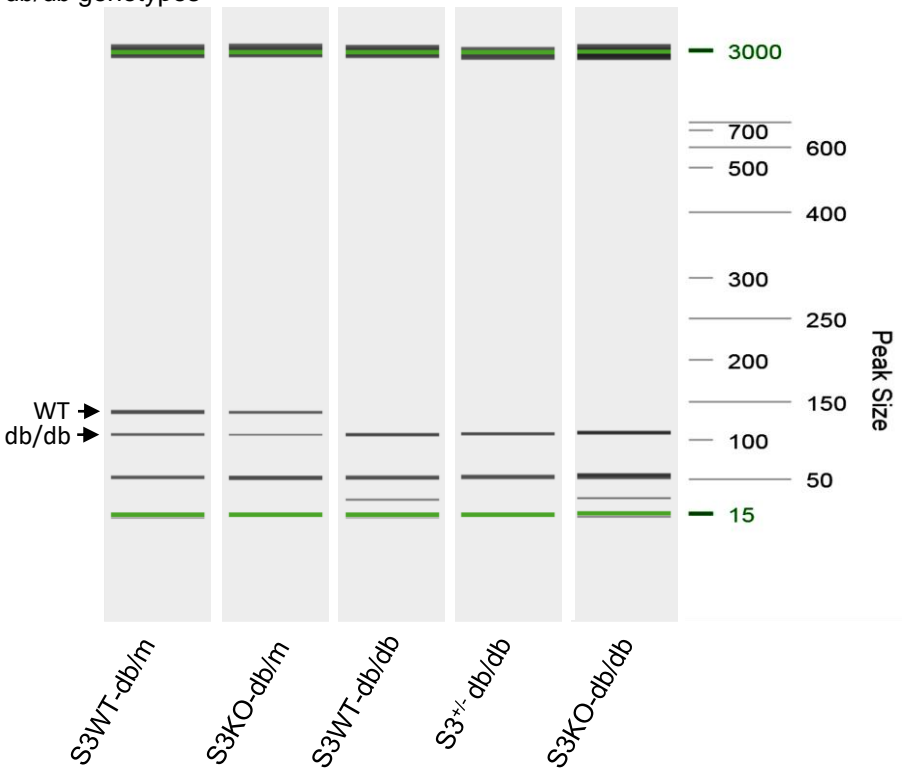

### Supplementary Figure 1. Genotypic determination of Smad3 KO from db/db mice.

PCR with individual primers specific to Smad3 or db/db shows that Smad3 WT (431bp) and Smad3 KO (248bp) in db/m (WT 135bp) and db/db (108bp) mice are clearly identified and 5 mouse genotypes are determined.
